# Supplementary material for: Prognostic Role of Tumor Mutation Burden Combined With Immune Infiltrates in Skin Cutaneous Melanoma Based on Multi-Omics Analysis
Source: Front Oncol. 2020 Nov 10;10:570654. doi: 10.3389/fonc.2020.570654 (PMC7683772; doi:10.3389/fonc.2020.570654)
Supplement: Supplementary file 9 [file Table_4.xlsx]

## Sheet: Sheet1
Table S4. Top KEGG items for differentially expressed genes.
ID	Description	Gene ratio	Bg ratio	P value	p.adjust	qvalue	Gene ID	Count
hsa00590	Arachidonic acid metabolism	7/80	63/8039	2.61816e-06	0.000345597	0.000303155	ALOX12B/AKR1C3/ALOX15/PTGS1/GPX3/PLA2G4F/PLA2G2A	7
hsa05412	Arrhythmogenic right ventricular cardiomyopathy (ARVC)	5/80	77/8039	0.000971169	0.0515706	0.0452374	JUP/ITGB8/CACNG4/PKP2/DSC2	5
hsa00600	Sphingolipid metabolism	4/80	47/8039	0.00117206	0.0515706	0.0452374	SMPD3/ACER1/SGPP2/DEGS2	4
hsa00591	Linoleic acid metabolism	3/80	29/8039	0.00287804	0.0768381	0.0674018	ALOX15/PLA2G4F/PLA2G2A	3
hsa04550	Signaling pathways regulating pluripotency of stem cells	6/80	143/8039	0.00291053	0.0768381	0.0674018	FGFR3/WNT6/FZD10/WNT11/FGFR2/ONECUT1	6
hsa05226	Gastric cancer	6/80	149/8039	0.00356889	0.0785156	0.0688734	WNT6/JUP/FGF5/FZD10/WNT11/FGFR2	6
hsa04924	Renin secretion	4/80	69/8039	0.00481658	0.0825413	0.0724047	ADCYAP1R1/CLCA2/CLCA4/EDN3	4
hsa05165	Human papillomavirus infection	9/80	330/8039	0.0052781	0.0825413	0.0724047	WNT6/PPP2R2C/CRB3/LAMA3/COMP/TNN/ITGB8/FZD10/WNT11	9
hsa04726	Serotonergic synapse	5/80	115/8039	0.00562782	0.0825413	0.0724047	CYP4X1/ALOX12B/ALOX15/PTGS1/PLA2G4F	5
hsa04071	Sphingolipid signaling pathway	5/80	119/8039	0.00649442	0.0857264	0.0751986	ACER1/SGPP2/S1PR5/PPP2R2C/DEGS2	5
hsa04512	ECM-receptor interaction	4/80	88/8039	0.0112751	0.135301	0.118685	LAMA3/COMP/TNN/ITGB8	4
hsa04913	Ovarian steroidogenesis	3/80	51/8039	0.0140287	0.154315	0.135364	AKR1C3/BMP6/PLA2G4F	3
hsa04972	Pancreatic secretion	4/80	102/8039	0.0185184	0.167	0.146491	CLCA2/CLCA4/CPA3/PLA2G2A	4
hsa04080	Neuroactive ligand-receptor interaction	8/80	340/8039	0.0193295	0.167	0.146491	F2RL2/P2RY2/S1PR5/ADRA2A/ADCYAP1R1/VIPR1/GAL/EDN3	8
hsa04390	Hippo signaling pathway	5/80	157/8039	0.0198163	0.167	0.146491	WNT6/PPP2R2C/BMP6/FZD10/WNT11	5
hsa04310	Wnt signaling pathway	5/80	160/8039	0.0213167	0.167	0.146491	WNT6/LGR5/FZD10/WNT11/DKK1	5
hsa04614	Renin-angiotensin system	2/80	23/8039	0.0216133	0.167	0.146491	MME/CPA3	2
hsa04151	PI3K-Akt signaling pathway	8/80	354/8039	0.0239663	0.167	0.146491	FGFR3/PPP2R2C/LAMA3/COMP/TNN/ITGB8/FGF5/FGFR2	8
hsa05217	Basal cell carcinoma	3/80	63/8039	0.02458	0.167	0.146491	WNT6/FZD10/WNT11	3
hsa00592	alpha-Linolenic acid metabolism	2/80	25/8039	0.0253031	0.167	0.146491	PLA2G4F/PLA2G2A	2
hsa04360	Axon guidance	5/80	181/8039	0.0339128	0.213166	0.186988	SEMA3D/RHOD/RGMA/EPHB6/SLIT3	5
hsa05010	Alzheimer disease	7/80	334/8039	0.0478691	0.287215	0.251943	CASP12/WNT6/TUBA4A/FZD10/MME/WNT11/DKK1	7
hsa04960	Aldosterone-regulated sodium reabsorption	2/80	37/8039	0.0520491	0.298717	0.262032	SCNN1B/SCNN1A	2
hsa05224	Breast cancer	4/80	147/8039	0.0584242	0.321333	0.281871	WNT6/FGF5/FZD10/WNT11	4
hsa04974	Protein digestion and absorption	3/80	95/8039	0.0685206	0.351594	0.308415	ELN/MME/CPA3	3
hsa05150	Staphylococcus aureus infection	3/80	96/8039	0.0702427	0.351594	0.308415	DEFB1/KRT17/KRT14	3
hsa04010	MAPK signaling pathway	6/80	294/8039	0.0719169	0.351594	0.308415	FGFR3/MAP3K8/FGF5/CACNG4/PLA2G4F/FGFR2	6
hsa04916	Melanogenesis	3/80	101/8039	0.0791438	0.35574	0.312053	WNT6/FZD10/WNT11	3
hsa00565	Ether lipid metabolism	2/80	47/8039	0.0793249	0.35574	0.312053	PLA2G4F/PLA2G2A	2
hsa04014	Ras signaling pathway	5/80	232/8039	0.0808501	0.35574	0.312053	FGFR3/FGF5/PLA2G4F/FGFR2/PLA2G2A	5
hsa00240	Pyrimidine metabolism	2/80	57/8039	0.110023	0.453843	0.398108	ENTPD3/CDA	2
hsa05014	Amyotrophic lateral sclerosis (ALS)	2/80	57/8039	0.110023	0.453843	0.398108	CASP12/GPX3	2
hsa00140	Steroid hormone biosynthesis	2/80	61/8039	0.123058	0.492231	0.431781	AKR1C3/SULT1E1	2
hsa04510	Focal adhesion	4/80	199/8039	0.136105	0.528408	0.463516	LAMA3/COMP/TNN/ITGB8	4
hsa04270	Vascular smooth muscle contraction	3/80	132/8039	0.143879	0.54263	0.475991	EDN3/PLA2G4F/PLA2G2A	3
hsa05230	Central carbon metabolism in cancer	2/80	69/8039	0.150145	0.543624	0.476864	FGFR3/FGFR2	2
hsa04210	Apoptosis	3/80	136/8039	0.153248	0.543624	0.476864	CASP12/TUBA4A/TP53AIP1	3
hsa00360	Phenylalanine metabolism	1/80	17/8039	0.156498	0.543624	0.476864	ALDH3A1	1
hsa04810	Regulation of actin cytoskeleton	4/80	213/8039	0.161939	0.548101	0.48079	FGFR3/ITGB8/FGF5/FGFR2	4
hsa01521	EGFR tyrosine kinase inhibitor resistance	2/80	79/8039	0.185455	0.587202	0.51509	FGFR3/FGFR2	2
hsa04742	Taste transduction	2/80	83/8039	0.199903	0.587202	0.51509	SCNN1B/SCNN1A	2
hsa04150	mTOR signaling pathway	3/80	155/8039	0.200127	0.587202	0.51509	WNT6/FZD10/WNT11	3
hsa04934	Cushing syndrome	3/80	155/8039	0.200127	0.587202	0.51509	WNT6/FZD10/WNT11	3
hsa00340	Histidine metabolism	1/80	23/8039	0.205743	0.587202	0.51509	ALDH3A1	1
hsa04217	Necroptosis	3/80	159/8039	0.210414	0.587202	0.51509	ALOX15/IL33/PLA2G4F	3
hsa04911	Insulin secretion	2/80	86/8039	0.210827	0.587202	0.51509	RIMS2/ADCYAP1R1	2
hsa05410	Hypertrophic cardiomyopathy (HCM)	2/80	90/8039	0.225484	0.587202	0.51509	ITGB8/CACNG4	2
hsa00790	Folate biosynthesis	1/80	26/8039	0.229289	0.587202	0.51509	AKR1C3	1
hsa04950	Maturity onset diabetes of the young	1/80	26/8039	0.229289	0.587202	0.51509	ONECUT1	1
hsa05225	Hepatocellular carcinoma	3/80	168/8039	0.233973	0.587202	0.51509	WNT6/FZD10/WNT11	3
hsa04530	Tight junction	3/80	169/8039	0.236621	0.587202	0.51509	PPP2R2C/CRB3/TUBA4A	3
hsa00062	Fatty acid elongation	1/80	27/8039	0.236984	0.587202	0.51509	THEM5	1
hsa05164	Influenza A	3/80	170/8039	0.239275	0.587202	0.51509	TPSB2/TPSD1/IL33	3
hsa04350	TGF-beta signaling pathway	2/80	94/8039	0.240219	0.587202	0.51509	BMP6/RGMA	2
hsa05414	Dilated cardiomyopathy (DCM)	2/80	96/8039	0.247607	0.593582	0.520686	ITGB8/CACNG4	2
hsa00564	Glycerophospholipid metabolism	2/80	98/8039	0.255003	0.593582	0.520686	PLA2G4F/PLA2G2A	2
hsa04640	Hematopoietic cell lineage	2/80	99/8039	0.258704	0.593582	0.520686	MME/CD24	2
hsa04750	Inflammatory mediator regulation of TRP channels	2/80	100/8039	0.262405	0.593582	0.520686	P2RY2/PLA2G4F	2
hsa00410	beta-Alanine metabolism	1/80	31/8039	0.267011	0.593582	0.520686	ALDH3A1	1
hsa05146	Amoebiasis	2/80	102/8039	0.26981	0.593582	0.520686	SERPINB13/LAMA3	2
hsa05020	Prion diseases	1/80	35/8039	0.29587	0.640244	0.561618	CASP12	1
hsa00350	Tyrosine metabolism	1/80	36/8039	0.302908	0.644901	0.565703	ALDH3A1	1
hsa05205	Proteoglycans in cancer	3/80	205/8039	0.334308	0.668111	0.586062	WNT6/FZD10/WNT11	3
hsa04060	Cytokine-cytokine receptor interaction	4/80	294/8039	0.335668	0.668111	0.586062	CXCL14/BMP6/CNTFR/IL33	4
hsa04216	Ferroptosis	1/80	41/8039	0.337068	0.668111	0.586062	ALOX15	1
hsa05219	Bladder cancer	1/80	41/8039	0.337068	0.668111	0.586062	FGFR3	1
hsa04015	Rap1 signaling pathway	3/80	210/8039	0.348011	0.668111	0.586062	FGFR3/FGF5/FGFR2	3
hsa04975	Fat digestion and absorption	1/80	43/8039	0.350265	0.668111	0.586062	PLA2G2A	1
hsa04611	Platelet activation	2/80	124/8039	0.350664	0.668111	0.586062	PTGS1/PLA2G4F	2
hsa04962	Vasopressin-regulated water reabsorption	1/80	44/8039	0.356765	0.668111	0.586062	AQP3	1
hsa02010	ABC transporters	1/80	45/8039	0.363202	0.668111	0.586062	DEFB1	1
hsa04024	cAMP signaling pathway	3/80	216/8039	0.364424	0.668111	0.586062	ADCYAP1R1/HCAR2/EDN3	3
hsa05144	Malaria	1/80	50/8039	0.394442	0.713237	0.625647	COMP	1
hsa04915	Estrogen signaling pathway	2/80	138/8039	0.400663	0.714697	0.626927	KRT17/KRT14	2
hsa04923	Regulation of lipolysis in adipocytes	1/80	56/8039	0.429937	0.742402	0.65123	PTGS1	1
hsa00480	Glutathione metabolism	1/80	57/8039	0.43565	0.742402	0.65123	GPX3	1
hsa04261	Adrenergic signaling in cardiomyocytes	2/80	149/8039	0.4387	0.742402	0.65123	PPP2R2C/CACNG4	2
hsa04370	VEGF signaling pathway	1/80	59/8039	0.446907	0.742402	0.65123	PLA2G4F	1
hsa04145	Phagosome	2/80	152/8039	0.448853	0.742402	0.65123	TUBA4A/COMP	2
hsa04730	Long-term depression	1/80	60/8039	0.452451	0.742402	0.65123	PLA2G4F	1
hsa04921	Oxytocin signaling pathway	2/80	154/8039	0.455565	0.742402	0.65123	CACNG4/PLA2G4F	2
hsa04623	Cytosolic DNA-sensing pathway	1/80	63/8039	0.468759	0.754587	0.661918	IL33	1
hsa00830	Retinol metabolism	1/80	67/8039	0.489758	0.75958	0.666298	SDR16C5	1
hsa05221	Acute myeloid leukemia	1/80	67/8039	0.489758	0.75958	0.666298	JUP	1
hsa00010	Glycolysis / Gluconeogenesis	1/80	68/8039	0.494878	0.75958	0.666298	ALDH3A1	1
hsa04664	Fc epsilon RI signaling pathway	1/80	68/8039	0.494878	0.75958	0.666298	PLA2G4F	1
hsa00982	Drug metabolism - cytochrome P450	1/80	72/8039	0.514857	0.760888	0.667446	ALDH3A1	1
hsa04115	p53 signaling pathway	1/80	72/8039	0.514857	0.760888	0.667446	TP53AIP1	1
hsa05218	Melanoma	1/80	72/8039	0.514857	0.760888	0.667446	FGF5	1
hsa00562	Inositol phosphate metabolism	1/80	74/8039	0.524551	0.760888	0.667446	PLCH2	1
hsa04918	Thyroid hormone synthesis	1/80	74/8039	0.524551	0.760888	0.667446	GPX3	1
hsa00980	Metabolism of xenobiotics by cytochrome P450	1/80	77/8039	0.538736	0.772969	0.678043	ALDH3A1	1
hsa00983	Drug metabolism - other enzymes	1/80	79/8039	0.547959	0.777749	0.682236	CDA	1
hsa05202	Transcriptional misregulation in cancer	2/80	186/8039	0.556274	0.78115	0.685219	JUP/HOXA9	2
hsa05204	Chemical carcinogenesis	1/80	83/8039	0.565863	0.785913	0.689397	ALDH3A1	1
hsa04610	Complement and coagulation cascades	1/80	85/8039	0.57455	0.785913	0.689397	F2RL2	1
hsa04260	Cardiac muscle contraction	1/80	87/8039	0.583066	0.785913	0.689397	CACNG4	1
hsa04540	Gap junction	1/80	88/8039	0.587261	0.785913	0.689397	TUBA4A	1
hsa03015	mRNA surveillance pathway	1/80	91/8039	0.599596	0.785913	0.689397	PPP2R2C	1
hsa05222	Small cell lung cancer	1/80	92/8039	0.603626	0.785913	0.689397	LAMA3	1
hsa04666	Fc gamma R-mediated phagocytosis	1/80	93/8039	0.607616	0.785913	0.689397	PLA2G4F	1
hsa04912	GnRH signaling pathway	1/80	93/8039	0.607616	0.785913	0.689397	PLA2G4F	1
hsa04713	Circadian entrainment	1/80	97/8039	0.623184	0.785913	0.689397	ADCYAP1R1	1
hsa05215	Prostate cancer	1/80	97/8039	0.623184	0.785913	0.689397	FGFR2	1
hsa05231	Choline metabolism in cancer	1/80	98/8039	0.62698	0.785913	0.689397	PLA2G4F	1
hsa04061	Viral protein interaction with cytokine and cytokine receptor	1/80	100/8039	0.634458	0.785913	0.689397	CXCL14	1
hsa05142	Chagas disease (American trypanosomiasis)	1/80	102/8039	0.641788	0.785913	0.689397	PPP2R2C	1
hsa04620	Toll-like receptor signaling pathway	1/80	104/8039	0.648974	0.785913	0.689397	MAP3K8	1
hsa04660	T cell receptor signaling pathway	1/80	104/8039	0.648974	0.785913	0.689397	MAP3K8	1
hsa04668	TNF signaling pathway	1/80	112/8039	0.676318	0.80427	0.7055	MAP3K8	1
hsa05145	Toxoplasmosis	1/80	112/8039	0.676318	0.80427	0.7055	LAMA3	1
hsa04724	Glutamatergic synapse	1/80	114/8039	0.682819	0.804751	0.705922	PLA2G4F	1
hsa04152	AMPK signaling pathway	1/80	120/8039	0.701557	0.819518	0.718876	PPP2R2C	1
hsa04144	Endocytosis	2/80	247/8039	0.710274	0.820106	0.719391	FGFR3/FGFR2	2
hsa05012	Parkinson disease	2/80	249/8039	0.714486	0.820106	0.719391	SNCAIP/TUBA4A	2
hsa00230	Purine metabolism	1/80	130/8039	0.730388	0.83015	0.728202	ENTPD3	1
hsa04728	Dopaminergic synapse	1/80	132/8039	0.735815	0.83015	0.728202	PPP2R2C	1
hsa05016	Huntington disease	2/80	271/8039	0.757563	0.847444	0.743372	TUBA4A/GPX3	2
hsa04072	Phospholipase D signaling pathway	1/80	148/8039	0.77552	0.853072	0.748309	PLA2G4F	1
hsa04514	Cell adhesion molecules (CAMs)	1/80	148/8039	0.77552	0.853072	0.748309	ITGB8	1
hsa05160	Hepatitis C	1/80	155/8039	0.79098	0.859443	0.753897	PPP2R2C	1
hsa04630	JAK-STAT signaling pathway	1/80	162/8039	0.805387	0.859443	0.753897	CNTFR	1
hsa05161	Hepatitis B	1/80	162/8039	0.805387	0.859443	0.753897	CASP12	1
hsa04022	cGMP-PKG signaling pathway	1/80	167/8039	0.815074	0.859443	0.753897	ADRA2A	1
hsa04141	Protein processing in endoplasmic reticulum	1/80	167/8039	0.815074	0.859443	0.753897	CASP12	1
hsa05206	MicroRNAs in cancer	2/80	310/8039	0.820377	0.859443	0.753897	FGFR3/TNN	2
hsa04621	NOD-like receptor signaling pathway	1/80	181/8039	0.839734	0.872795	0.765609	CASP12	1
hsa04062	Chemokine signaling pathway	1/80	189/8039	0.852337	0.878972	0.771028	CXCL14	1
hsa05169	Epstein-Barr virus infection	1/80	201/8039	0.869428	0.884157	0.775576	ENTPD3	1
hsa05130	Pathogenic Escherichia coli infection	1/80	202/8039	0.87076	0.884157	0.775576	TUBA4A	1
hsa05131	Shigellosis	1/80	239/8039	0.911664	0.918623	0.80581	GJB2	1
hsa04740	Olfactory transduction	1/80	448/8039	0.990055	0.990055	0.868469	OR9G1	1
